# Supplementary material for: Inadvertent Selection of a Pathogenic Fungus Highlights Areas of Concern in Human Clinical Practices
Source: MDPI journal article supplement (doi:10.3390/jof8020157), 2022-02-05
Supplement: s1 [file s1]

|                              |                 | Oxivir® (%) | CaviCide™ (%) | Fluconazole (µg/ml) | Micafungin (µg/ml) | 5-Flucytosine (µg/ml) | Amphotericin B (µg/ml) |
|------------------------------|-----------------|-------------|---------------|---------------------|--------------------|-----------------------|------------------------|
| Passaging<br>Experiment<br>1 | B11804 parental | 10          | 0.625         | 4                   | 1                  | 0.5                   | 1                      |
|                              | B11804 YPD 1    | 10          | 0.625         | 4                   | 0.5                | 0.25                  | 1                      |
|                              | B11804 YPD 2    | 10          | 0.625         | 4                   | 1                  | 0.5                   | 1                      |
|                              | B11804 YPD 3    | 10          | 0.625         | 4                   | 1                  | 0.5                   | 1                      |
|                              | B11804 OX 1     | 10          | 0.625         | 32                  | 0.125              | 0.0625                | 1                      |
|                              | B11804 OX 2     | 10          | 0.625         | 32                  | 0.125              | 0.0625                | 1                      |
|                              | B11804 OX 3     | 10          | 0.625         | 32                  | 0.125              | 0.0625                | 1                      |
|                              | B11804 CAV 1    | 10          | 1.25          | 64                  | 0.0625             | 0.0625                | 1                      |
|                              | B11804 CAV 2    | 10          | 1.25          | 64                  | 0.0625             | 0.0625                | 1                      |
|                              | B11804 CAV 3    | 10          | 1.25          | 64                  | 0.0625             | 0.0625                | 1                      |
|                              |                 |             |               |                     |                    |                       |                        |
|                              | B11785 parental | 10          | 0.625         | 4                   | 1                  | 0.5                   | 4                      |
|                              | B11785 YPD 1    | 10          | 0.625         | 64                  | 0.125              | 0.5                   | 2                      |
|                              | B11785 YPD 2    | 10          | 0.625         | 4                   | 1                  | 0.5                   | 4                      |
|                              | B11785 YPD 3    | 10          | 0.625         | 4                   | 1                  | 0.5                   | 4                      |
|                              | B11785 OX 1     | 10          | 0.625         | 32                  | 0.125              | 0.0625                | 1                      |
|                              | B11785 OX 2     | 10          | 0.625         | 32                  | 0.125              | 0.0625                | 1                      |
|                              | B11785 OX 3     | 10          | 0.625         | 64                  | 0.125              | 0.0625                | 1                      |
|                              | B11785 CAV 1    | 10          | 1.25          | 64                  | 0.0625             | 0.0625                | 1                      |
|                              | B11785 CAV 2    | 10          | 1.25          | 64                  | 1                  | 0.5                   | 1                      |
|                              | B11785 CAV 3    | 10          | 1.25          | 64                  | 0.0625             | 0.0625                | 1                      |
|                              |                 |             |               |                     |                    |                       |                        |
| Passaging<br>Experiment<br>2 | B11804 parental | 5           | 1.25          | 8                   | 0.25               | 2                     | 2                      |
|                              | B11804 YPD 1    | 10          | 1.25          | 4                   | 0.25               | 2                     | 2                      |
|                              | B11804 YPD 2    | 10          | 1.25          | 4                   | 0.25               | 2                     | 2                      |
|                              | B11804 YPD 3    | 10          | 1.25          | 4                   | 0.25               | 2                     | 2                      |
|                              | B11804 OX 1     | 10          | 0.625         | 64                  | 0.0625             | 0.125                 | 2                      |
|                              | B11804 OX 2     | 10          | 0.625         | 64                  | 0.0625             | 0.125                 | 2                      |
|                              | B11804 OX 3     | 10          | 0.625         | 64                  | 0.0625             | 0.125                 | 2                      |
|                              | B11804 CAV 1    | 10          | 2.5           | 8                   | 0.25               | 1                     | 2                      |
|                              | B11804 CAV 2    | 10          | 2.5           | 8                   | 0.25               | 1                     | 2                      |
|                              | B11804 CAV 3    | 10          | 2.5           | 64                  | 0.5                | 1                     | 2                      |
|                              |                 |             |               |                     |                    |                       |                        |
|                              | B11785 parental | 10          | 1.25          | 4                   | 0.25               | 2                     | 4                      |
|                              | B11785 YPD 1    | 5           | 1.25          | 4                   | 0.25               | 2                     | 4                      |
|                              | B11785 YPD 2    | 5           | 1.25          | 4                   | 0.25               | 2                     | 4                      |
|                              | B11785 YPD 3    | 10          | 1.25          | 4                   | 0.25               | 1                     | 4                      |
|                              | B11785 OX 1     | 10          | 0.625         | 4                   | 0.25               | 2                     | 4                      |
|                              | B11785 OX 2     | 10          | 0.625         | 4                   | 0.25               | 2                     | 4                      |
|                              | B11785 OX 3     | 10          | 0.625         | 4                   | 0.25               | 2                     | 4                      |
|                              | B11785 CAV 1    | 5           | 2.5           | 8                   | 0.25               | 2                     | 4                      |
|                              | B11785 CAV 2    | 10          | 5             | 4                   | 0.25               | 2                     | 4                      |
|                              | B11785 CAV 3    | 10          | 5             | 32                  | 0.25               | 2                     | 4                      |

**Table S1.** Raw MIC values (mode of technical replicates) for each population from both passaging experiments.

| Strain                                   | Allele for each locus |      |      |      |      |      | Sequence Type |
|------------------------------------------|-----------------------|------|------|------|------|------|---------------|
|                                          | FKS                   | LEU2 | NMT1 | TRP1 | UGP1 | URA3 |               |
| <i>C. glabrata</i> CBS138                | 8                     | 5    | 3    | 5    | 1    | 1    | 15            |
| <i>C. glabrata</i> BG2                   | 5                     | 7    | 8    | 7    | 3    | 6    | 3             |
| B11804 Oxivir <sup>®</sup> -passaged 1   | 5                     | 7    | 8    | 7    | 3    | 6    | 3             |
| B11804 CaviCide <sup>™</sup> -passaged 1 | 5                     | 7    | 8    | 7    | 3    | 6    | 3             |
| B11785 Oxivir <sup>®</sup> -passaged 1   | 5                     | 7    | 8    | 7    | 3    | 6    | 3             |
| B11785 CaviCide <sup>™</sup> -passaged 1 | 5                     | 7    | 8    | 7    | 3    | 6    | 3             |

**Table S2.** PubMLST analysis of sequenced populations that matched *C. glabrata* from passaging experiment 1.



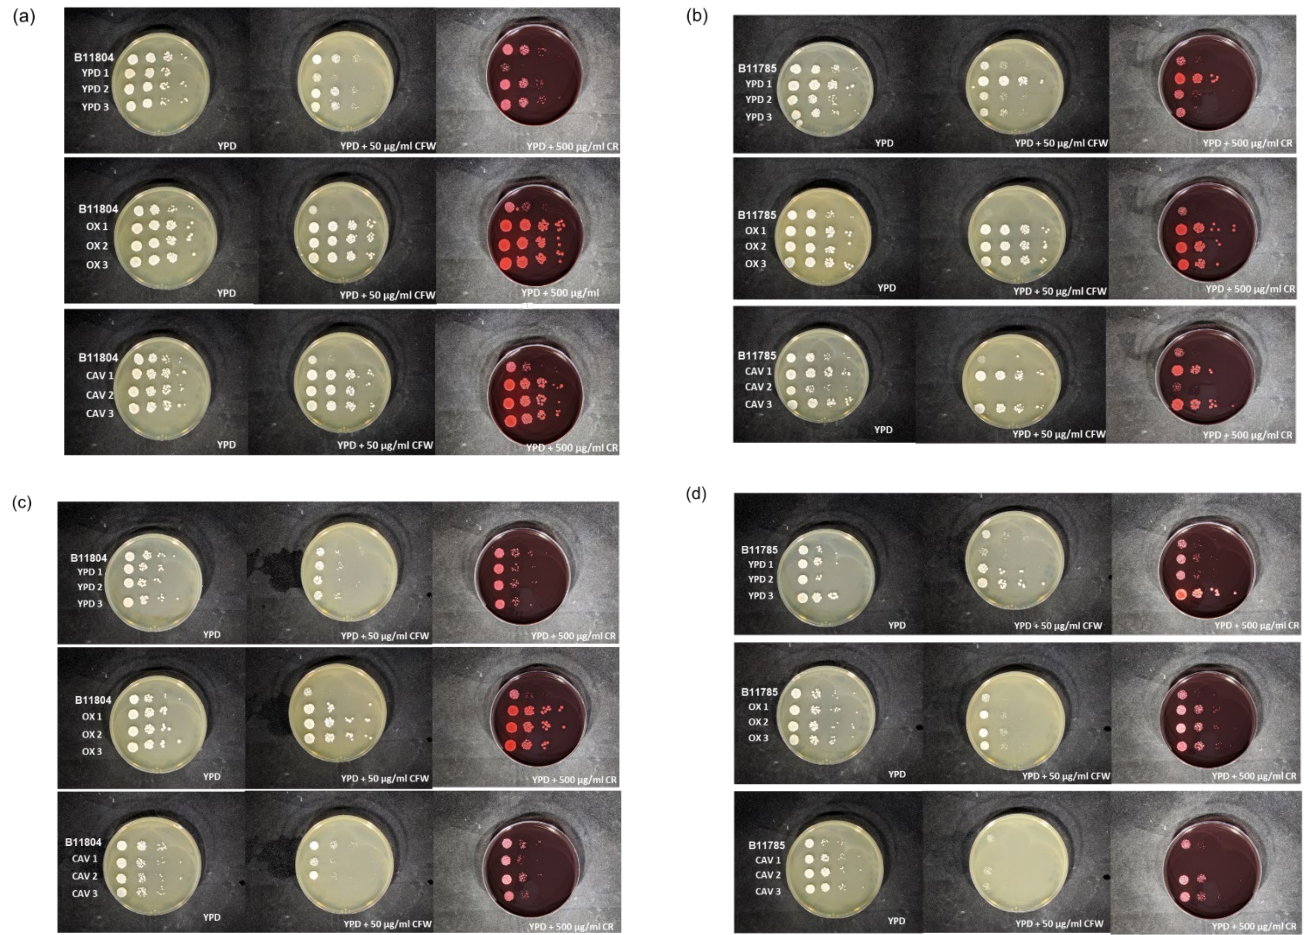

**Figure S2.** Cell wall stress tolerance assays with calcofluor white (CFW) and Congo Red (CR). (a) B11804-derived populations from passaging experiment 1. (b) B11785-derived populations from passaging experiment 1. (c) B11804-derived populations from passaging experiment 2. (d) B11785-derived populations from passaging experiment 2.

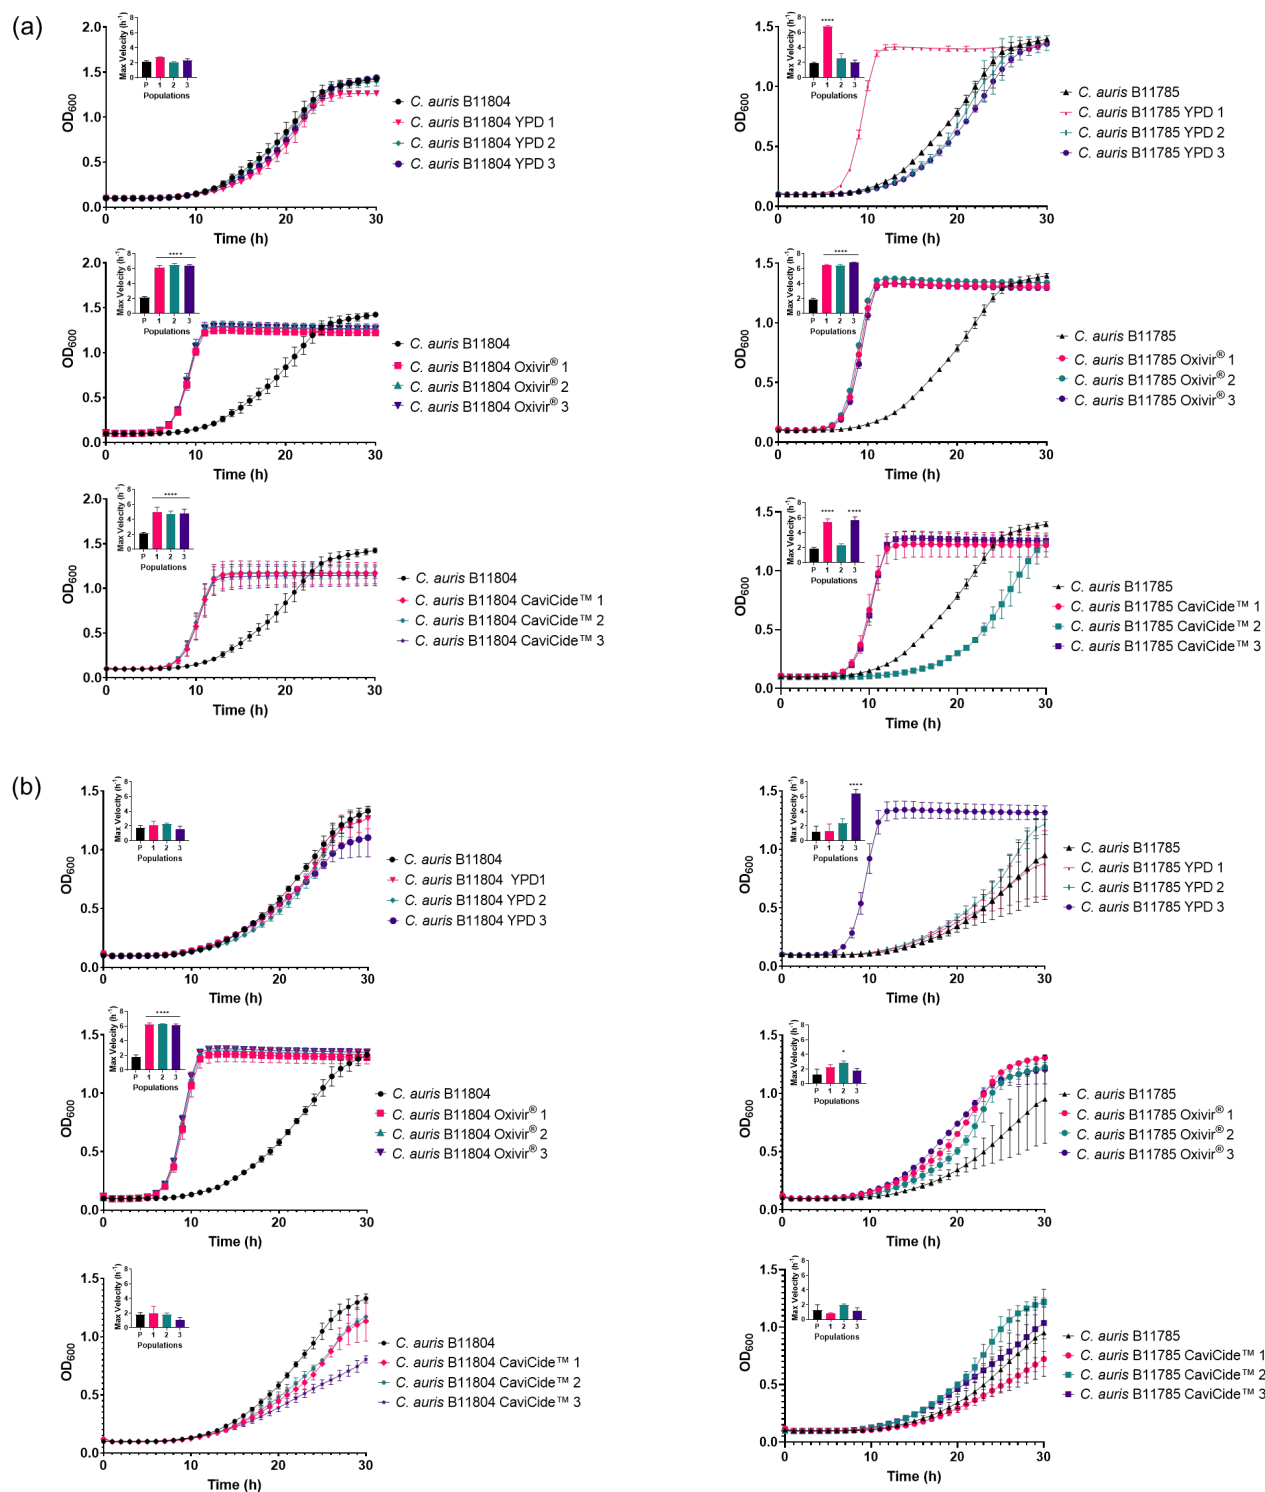

**Figure S3.** Growth curve assays with max velocity data inset. (a) Populations from passing experiment 1. (b) Populations from passing experiment 2.

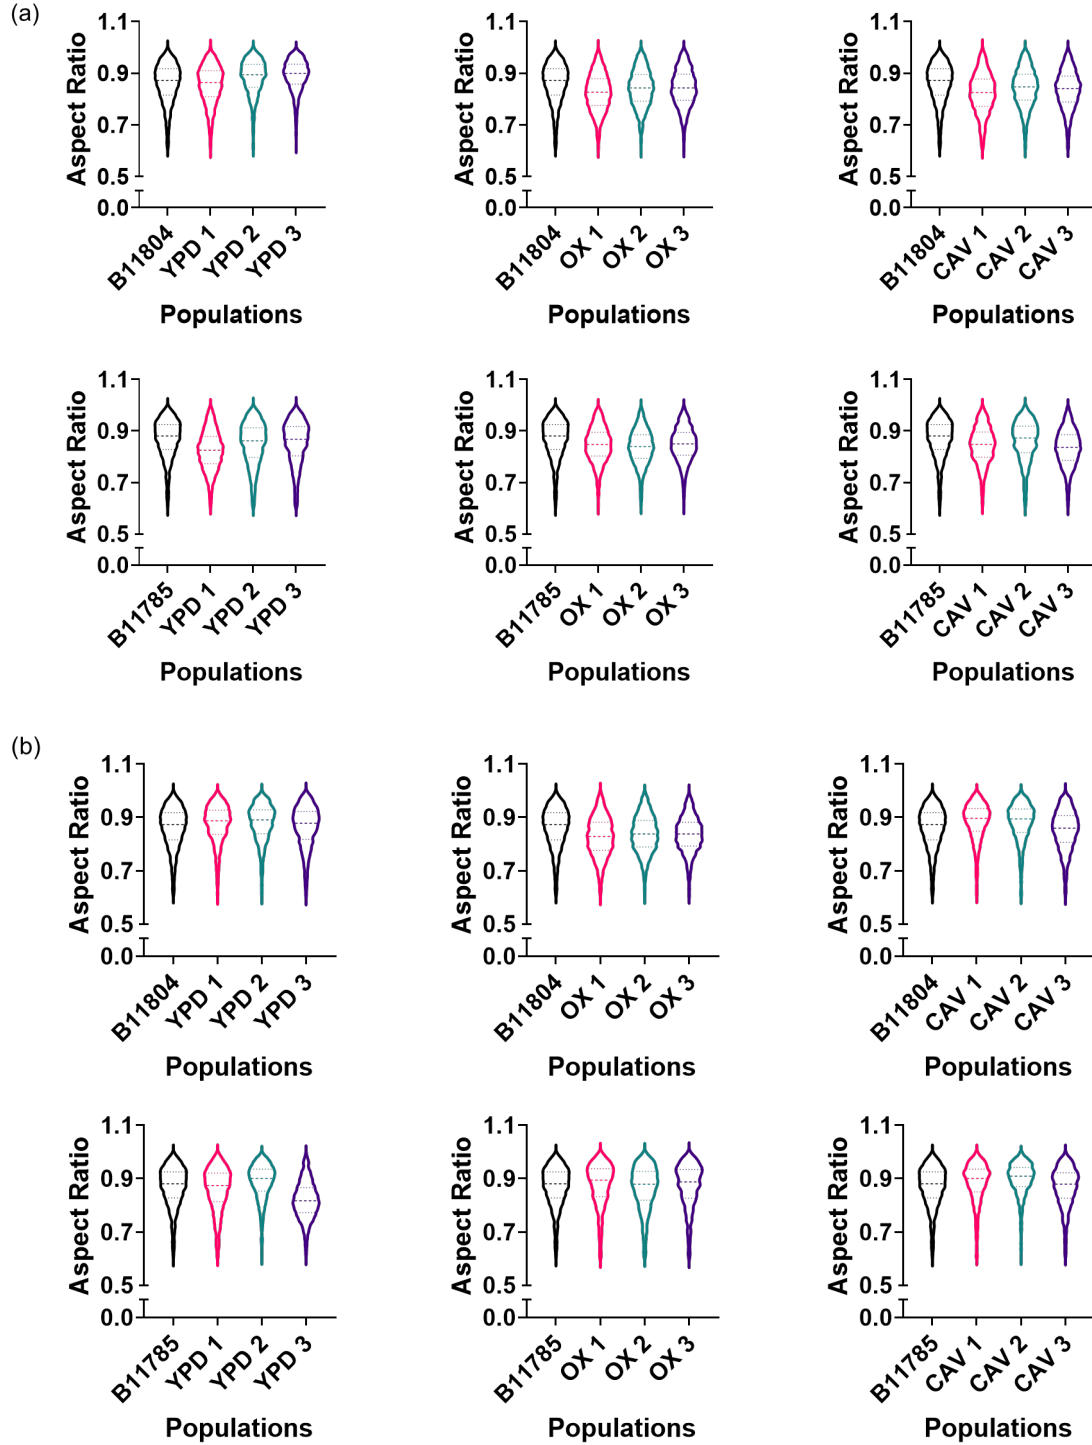

**Figure S4.** Cell shape analyses. (a) Populations from passaging experiment 1. (b) Populations from passaging experiment 2.

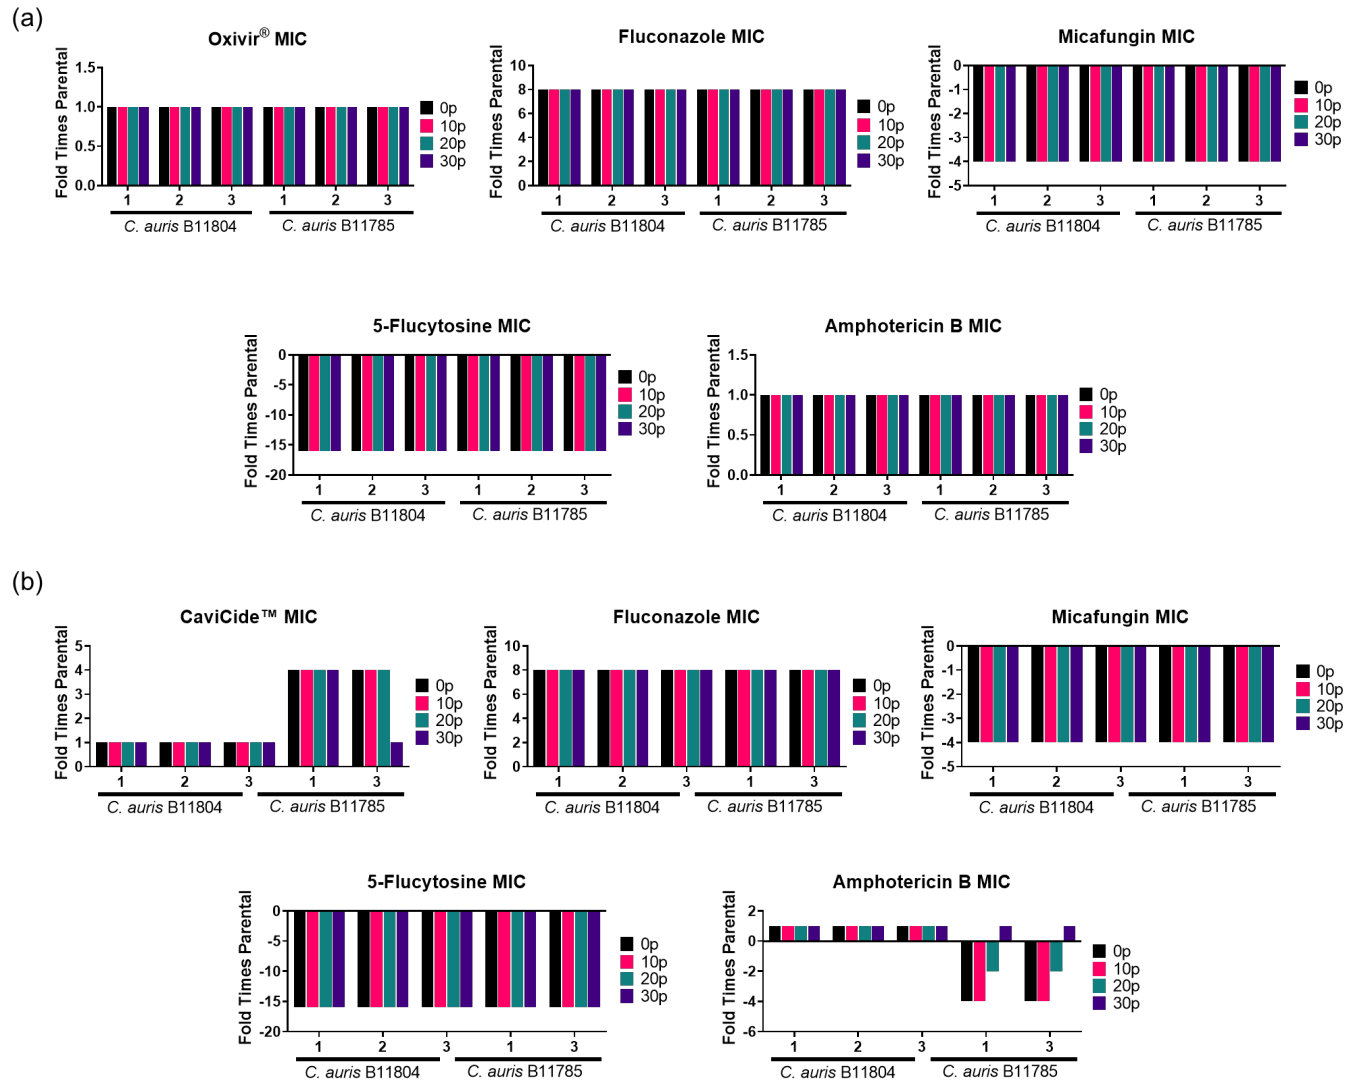

**Figure S5.** MIC assays of cleaner-passaged populations (experiment 1) after additional passaging in YPD alone. (a) Oxivir®-passaged populations. (b) CaviCide™-passaged populations.

(a)

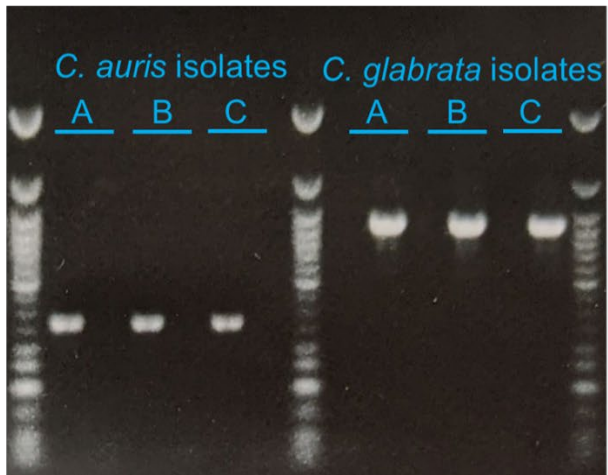

(b)

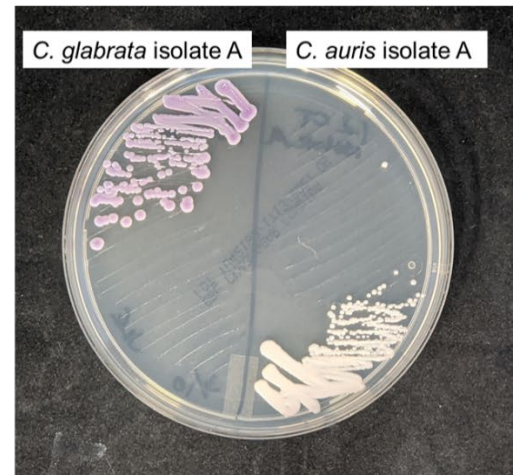

**Figure S6.** Verification of *C. auris* and *C. glabrata* isolates. (a) PCR-verification of isolates with ITS-specific primers. All isolates were tested with *C. auris*-specific primers (left) and *C. glabrata*-specific primers (right). (b) CHROMagar™ Candida phenotypes of isolates.



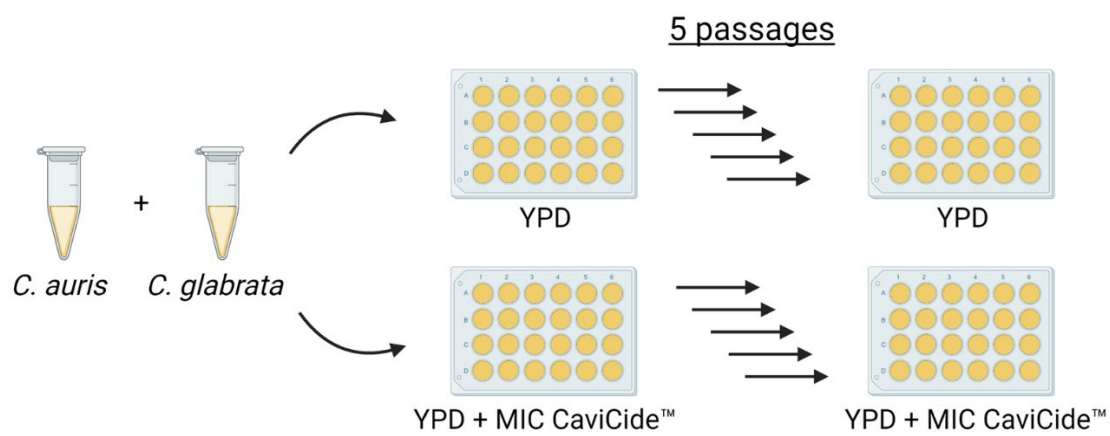

**Figure S7.** Passaging experimental setup with defined ratio of *C. auris* and *C. glabrata*. Created with BioRender.com.

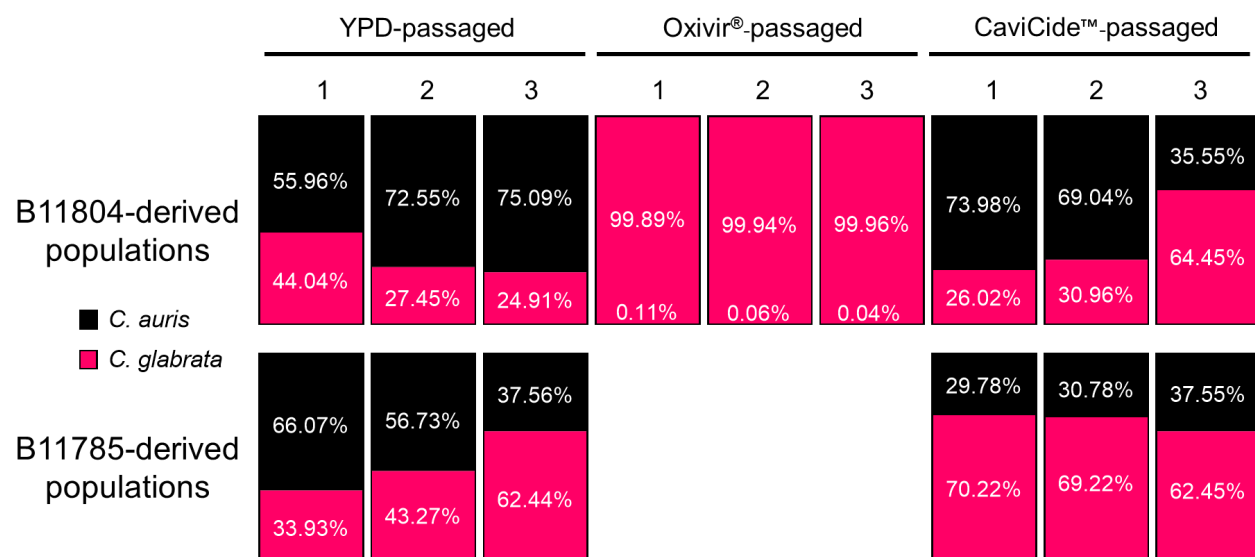

**Figure S8.** Retrospective analysis of populations from passaging experiment 2 with relative proportions of each species. Oxivir®-passaged, B11785-derived populations' glycerol stocks were no longer recoverable.
